# Supplementary material for: Injectable camptothecin conjugated hydrogels with simultaneous drug release and degradation
Source: Royal Society of Chemistry journal article supplement (doi:10.1039/c6ra20691c), 2016-01-01
Supplement: c6ra20691c1.pdf [file c6ra20691c1.pdf]

Electronic Supplementary Information for "Injectable camptothecin conjugated hydrogels with simultaneous drug release and degradation"

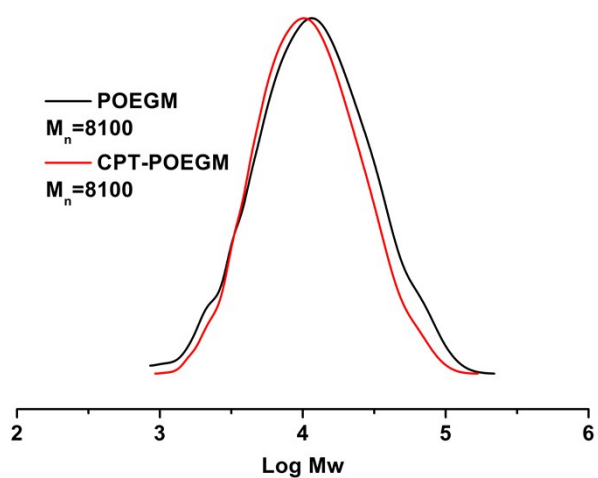

Fig. S1 GPC traces of POEGM and CPT-POEGM (conjugate 2).

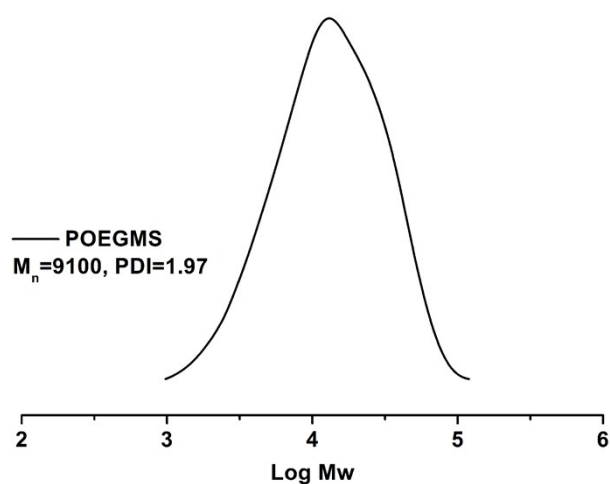

Fig. S2 GPC trace of POEGMS.

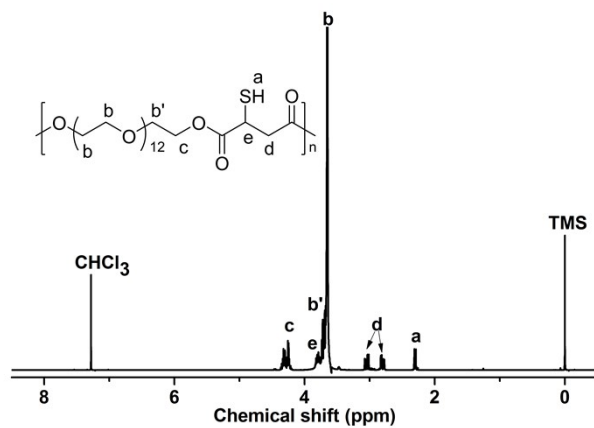

Fig. S3  $^1\text{H}$  NMR spectrum of POEGMS.

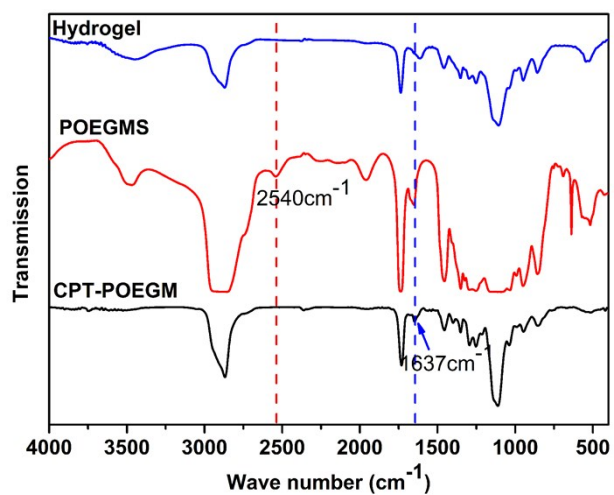

Fig. S4 FT-IR spectra of CPT-POEGM, POEGMS and hydrogel.

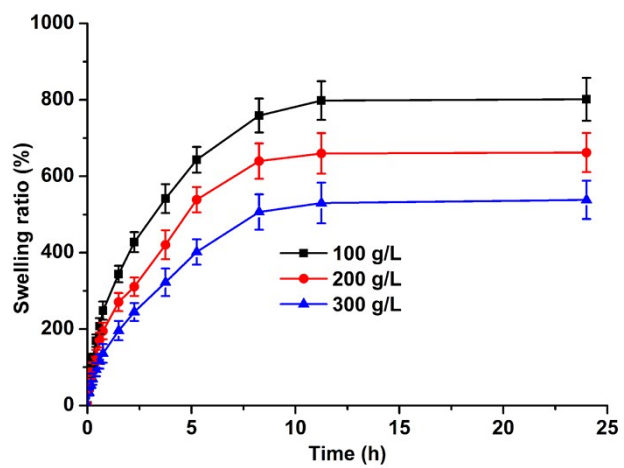

Fig. S5 Swelling curves of the lyophilized hydrogels with various original solid contents.
